# Supplementary material for: Midterm Outcomes in Patients With Aortic Stenosis Treated With Contemporary Balloon‐Expandable and Self‐Expanding Valves: Does Valve Size Have an Impact on Outcome?
Source: PubMed Central journal article supplement — J Am Heart Assoc. 2023 May 26;12(11):e028038. doi: 10.1161/JAHA.122.028038 (PMC10382012; doi:10.1161/jaha.122.028038), 2023-05-26
Supplement: JAH3-12-e028038-s001.pdf [file JAH3-12-e028038-s001.pdf]

# **SUPPLEMENTAL MATERIAL**

**Table S1.** Univariable and multivariable predictors of mid-term mortality

|                               | Univariable |       |       |         | Multivariable (N=336) |       |        |         |
|-------------------------------|-------------|-------|-------|---------|-----------------------|-------|--------|---------|
|                               | HR          | 95%CI |       | P value | HR                    | 95%CI |        | P value |
| Age                           | 1.18        | 0.63  | 2.19  | 0.609   | 1.05                  | 0.992 | 1.12   | 0.091   |
| Female sex                    | 1.33        | 0.6   | 3.0   | 0.485   | 1.05                  | 0.38  | 2.92   | 0.928   |
| Haemodialysis                 | 3.28        | 0.97  | 11.07 | 0.056   | 0.382                 | 0.009 | 15.703 | 0.612   |
| baseline Creatinine           | 1.004       | 1.001 | 1.008 | 0.016   | 1.01                  | 0.997 | 1.017  | 0.168   |
| baseline Severe PVR           | 7.5         | 1.003 | 56.75 | 0.050   | 10.8                  | 0.599 | 194.8  | 0.107   |
| post TAVI CVA post            | 3.52        | 1.38  | 8.95  | 0.008   | 6.01                  | 2.16  | 16.77  | 0.001   |
| TAVI                          | 1.48        | 0.97  | 2.24  | 0.069   | 1                     | 0.46  | 2.17   | 0.996   |
| AKI post TAVI                 | 6.15        | 1.46  | 25.86 | 0.013   | 2.6                   | 0.161 | 42     | 0.5     |
| New renal replacement therapy | 1.88        | 1.02  | 3.48  | 0.045   | 1.86                  | 0.78  | 4.47   | 0.163   |

BE vs. SE

CI: confidence interval, PVR: paravalvular regurgitation, CVA: cerebrovascular accident, TAVI: transcatheter aortic valve implantation, AKI: acute kidney injury, BE: balloon expandable, SE: self-expanding

**Figure S1.** Relative multivariate imbalance

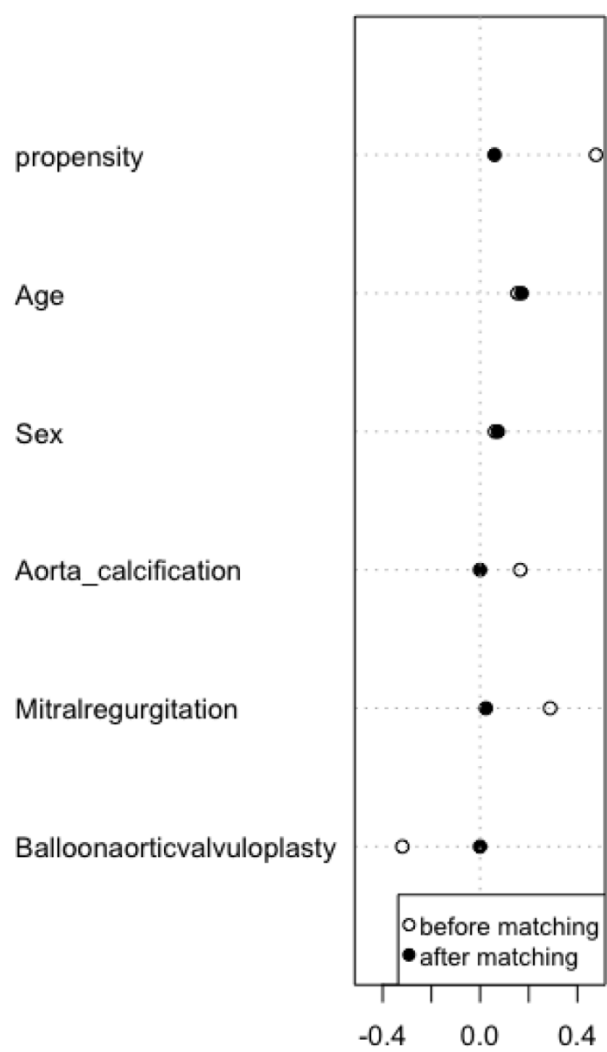

**Figure S2.** Standardized differences before and after matching

### Standardized differences before matching

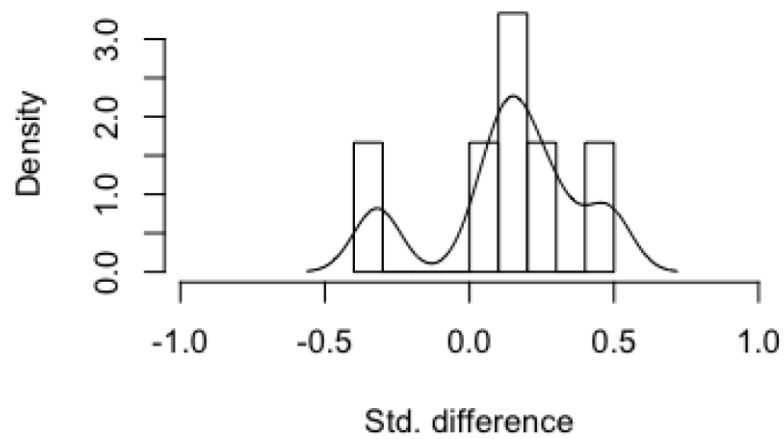

### Standardized differences after matching

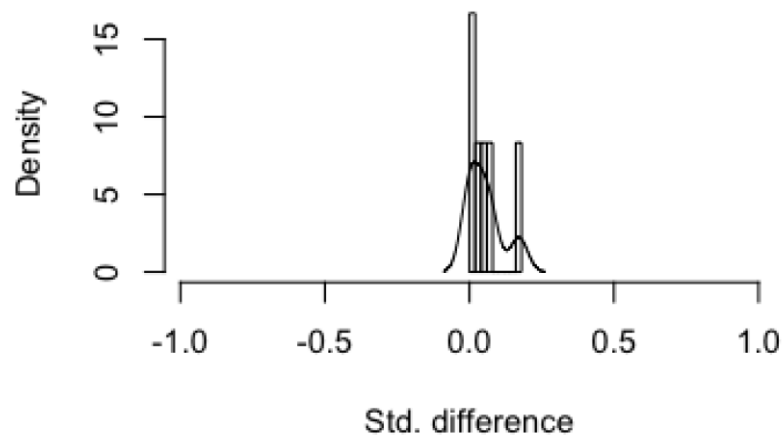

**Figure S3.** Mid-term survival in small transcatheter heart valve (THV) patients with transfemoral access.

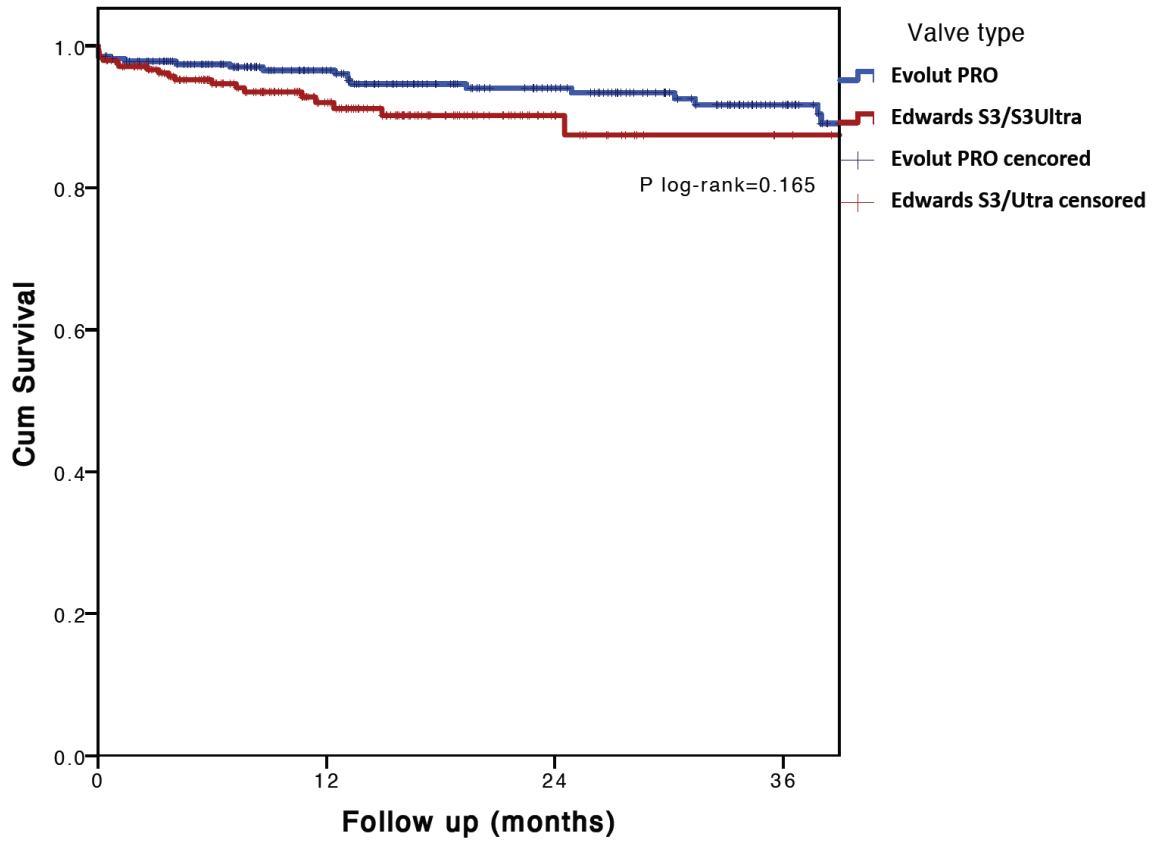

| Follow up (months) | 0   | 12  | 24  | 36 |
|--------------------|-----|-----|-----|----|
| Evolut PRO         | 273 | 203 | 146 | 80 |
| Edwards S3/Ultra   | 244 | 114 | 35  | 16 |
